# Supplementary material for: A cortical-hypothalamic circuit decodes social rank and promotes dominance behavior
Source: Research Square preprint supplement (doi:10.21203/rs.3.rs-94115/v1), 2020-11-03
Supplement: Supplementary file 1 [file 0bc5b4531984faf60b7408f7.docx]

**1. Subjects**

Adult (8-10 week old), wild-type male C57/BL6J mice from the Jackson Laboratory (RRID: IMSR_JAX:000664) were used for all experiments described. Mice were housed with randomly assigned littermates in cages of 3-4, maintained under a 12-hour reverse light/dark cycle, and given access to food and water *ad libitum* except where indicated in experimental proceedings. Experiments were conducted during the light-off light cycle phase. Experiments conducted at MIT were approved by the MIT IACUC while experiments conducted at the Salk Institute were approved by the Salk Institute IACUC.

**2. Surgery**

Surgeries were performed aseptically using a digital small animal stereotaxic instrument (David Kopf Instruments). Anesthesia was induced with 5% isoflurane and mice maintained at 1%-3% isoflurane in the stereotactic frame, with a heating pad stabilizing body temperature. Immediately post-surgery, all animals were injected subcutaneously with 1.0mL saline for rehydration and moved to a clean cage. Animals were allowed a recovery period of ≥7 days prior to experimental procedures and resumption of tube test ranking.

A beveled 33-gauge microinjection needle was used for all injections, and virus was delivered at a rate of 100nL/min using a 10mL microsyringe (nanofil; WPI) with both a microsyringe pump (UMP3; WPI) and controller (Micro4; WPI). For all injections, coordinates were measured relative to bregma. For the optogenetic stimulation experiment mPFC->LH experimental mice received two 200nL injections of AAV5-ef1-DIO-hCHR2-eYFP into the mPFC (AP: +1.8 ML: +0.3 DV: -2 and -2.5), an optical fiber in mPFC (AP +1.8 ML +0.3 DV: -2.25) and CAV2-Cre mixed AAV5-CAMKIIa-mCherry for visualization (3:1) into the LH (AP: -0.7 & -1.0 ML: 2.86 DV: 5.0) 20° vertical angle. Identical parameters were used for non-opsin control animals except the virus used for mPFC injections was AAV5-ef1-DIO-eYFP. For the phototagging experiments, mice received two injections of 200 nL of AAV8-hSyn-flex-Chrimson-tdtomato into the mPFC (AP: +1.8 ML: +0.3 DV: -2 and -2.5) and CAV2-Cre into the LH (AP: -0.7 & -1.0 ML: 2.86 DV: 5.0) 20° vertical angle. The optical fiber for phototagging experiments was placed in an angle to allow tethering the laser while the logger was connected, a fiber was implanted in AP: 1.8, ML-1.5 DV -1.3 with a 45° vertical angle. In addition, a ground wire was implanted in the left hemisphere touching the brain surface. Electrode implants and fiber implantation for the phototagging experiment were done in a second surgery 4 weeks after viral injection. The electrode consisted of a bundle of 32 single nichrome wires of 25 um diameter that was implanted into mPFC (AP: 1.8, ML: +0.5, DV: -2.25).All fibers and electrodes were secured using C&B-Metabond® Quick Adhesive Luting Cement (Parkell) and several additional layers of dental cement (Ortho-Jet powder, Lang Dental) were also applied.

**3. Food Restriction**

Subjects were fed *ad libitum* until initiation of experiments requiring food restriction (reward training). Prior to these experiments, subjects were weighed to the nearest tenth of a gram to attain a baseline for free-feeding body weight. During experiments requiring restriction, subjects were weighed daily and food-restricted to a limit of 85% of this baseline weight. Restriction was attained through limiting daily access to food pellets, providing approximately 2.5-4g/animal per cage per day or 3 hrs of unlimited access to food. Animals had free access to water throughout.

**4. Tube testing**

After at least 1-week post-surgery recovery, mice were handled for 15-min/day for two days to gain familiarity with experimenters and reduce stress during experiments. Tube training began after handling. The mouse tube test assay was adapted from Lindzey and colleagues1 and validated by Wang et al.2 for social dominance in mice. Mice were individually trained to walk through the tube for at least two days, until they were comfortably walking across without resistance. For testing to determine rank, all mice in each cage were tested in a round-robin design in a randomized order. For each pair, mice were released at opposite ends of the tube simultaneously. The mouse that either itself backed out or was pushed out from the end where it was released was designated as “loser/subordinate” whereas the other mouse was designated as “winner/dominant.” Social ranks obtained with the tube test were considered stable when obtaining the same results for 3 or more days in a row.

**5. Reward training and competition**

Food-restricted mice were trained individually in preparation for the reward competition. During training sessions, single mice were placed in a MED-PC chamber with an adapted 3D-printed reward port. Trials began with presentation of a red LED located above the reward port and a 60dB, 5kHz tone, which both lasted for 10-seconds. A 10uL reward of vanilla Ensure® was delivered after 2 seconds of tone onset. Inter-trial intervals (ITIs) lasted 60-100 seconds. A house light and white noise were on throughout the session. Training sessions consisted of at least 20 trials. Training consisted on 5-10 daily sessions until all mice within a cage reached learning criteria of collecting all the rewards with a mean latency of 5 seconds or less from tone onset. Reward port entries were detected through an electrical lickometer or infrared beam. After all mice in a cage attained learning criteria, we initiated reward competition. During competition, two mice were placed in one chamber. Competition sessions lasted 30-minutes (20 rewards) or 45-minutes (30 rewards). Mice competed against all other cagemates across days. During reward competition behavior was recorded via webcams. A custom-made MATLAB GUI was used to score pushing, resisting and displacement by a trained observer. The mouse that occupied the port for 3 seconds surrounding the reward delivery, or the first mouse to the port after reward delivery was considered the winner of the trial. Trials where these criteria were not met and thus who got the reward was unclear were excluded from analysis. AlphaTracker was used to track the nose, ears and tail base of both mice during the competition. For AlphaTracker analysis only videos with the same camera angle and zoom were pooled.

After 3 days of robin round competition, pairs of mice were selected for optogenetic reward competition experiments that met the following criteria: stable tube ranks and winning/losing relationship in the reward competition for two consecutive days or more. These select pairs did two more days of competitions, one day for a light OFF competition and the other for a light ON competition. For the light ON competition, the subordinate animal received laser stimulation in alternating epochs of 5 minutes of bursting stimulation (four 5 ms pulses at 100Hz every 200 ms) and 10 minutes of light off. Both animals were tethered to the patch cords during training prior to the competition. To prevent the two patch cords from tangling we designed a commutator to split the laser into two with a dual commutator and then into single commutators for each individual mouse.

Electrode-implanted mice were trained to wear 6g dummy headstage (mimicking the wireless logger weight) during their individual reward training. Individual reward training continued until mice reached the mean 5 sec latency criteria. During the reward competitions we recorded continuous signals from the 32 channels filtered for spikes (600-6,000 Hz) and a common average reference was applied using Trodes Software (SpikeGadgets). A wireless MiniLogger (SpikeGadgets) recorded locally and digitized mPFC neural activity. Tone times, port entries and laser pulses were detected with a main control unit that also triggered the miniloggers to record (Main Control Unit, SpikeGadgets). After recording sessions, logger data was extracted and merged with the MCU event related data. Spike sorting was done with Klusta3 and subsequently verified by a trained observer for merging, deleting or splitting spike clusters.

**6. Effort T-maze**

The effort T-maze task was adapted from Walton et al. (2002)4. Mice were trained on a T-maze (main arm: 40x8x15cm, side arms 30x8x15cm) to associate one side with a high reward (HR; 20μL droplet of 100% vanilla Ensure®) and the other side with a low reward (LR; 20μL droplet of 25% vanilla Ensure mixed with water). The side with the high arm and low arm were counterbalanced across subjects. Training lasted nine days. Mice were first habituated to the T-maze apparatus with the cagemates where droplets of Ensure® were placed through the arms. The next four days, mice were individually given forced trials to sample the LR and HR arms and free choice trials to determine arm preference. Each training day always started with a forced sampling of both arms. After mice consistently showed preference for the high arm side, on day 5, a 7 cm wall was introduced in the HR arm. Mice were habituated to performing the task (including climbing the walls) while tethered to the patch cord. They were trained with forced and free choice trials with the 7 cm wall and on day 8 the HR arm wall was replaced with a 15cm wall. After two days of training with the 15 cm wall, on day 10 mice received stimulation on 4 out of 8 trials, in blocks of two trials.

**7. Three-chamber Sociability Test**

This assay was adapted based on Moy, et al., (2004)5. For each trial, the subject was placed in a test chamber (57.15 x 22.5 x 30.5 cm), with the empty central compartment connected to one additional compartment of equal size on both sides. The compartments on both sides contained a single perforated cup. One cup was empty, whereas the other held a conspecific (novel juvenile) underneath. The subject was allowed to explore the chamber for a period of 10-min. Each subject underwent two social interaction tests separated by 24-hrs, with one test paired with optical stimulation and one without. All groups were counterbalanced for both order of light stimulation and a different novel juvenile was used on both days. EthoVision XT video tracking system (Noldus, Netherlands) was used to record and quantify time spent within each chamber.

**8. Open Field Test**

Subjects were tested individually, being placed in the center of a transparent, plastic chamber (53 x 53 cm) divided into a central and a peripheral field. The test consisted of a 10-min period divided into five 2-min epochs (OFF-ON-OFF-ON-OFF) in which the mouse freely investigated the chamber. Animals were recorded with a video camera and tracked for the duration of the test using EthoVision XT video tracking system.

**9. Conditioned Place Preference (CPP)**

A test chamber (57.15 x 22.5 x 30.5 cm) with a monochromatic wallpaper of different patterns on each side was used. On day 1, each mouse was allowed 15-min free exploration of the apparatus. Mice with strong side preference (≥60%) were excluded from days 2-3. On day 2, mice received two (≥2-hr separation) 30-min conditioning sessions while confined to one side of the chamber. Mice received optogenetic stimulation in one side only, counterbalancing for order and side across animals. On day 3, mice were allowed to explore freely for 45-min, the first 10-min used for analysis. All sessions were EthoVision-tracked and video-recorded.

**10. Food Assay**

Each animal was individually placed in a clean cage along with a single food pellet, then stimulated for three 10-min OFF-ON-OFF epochs. Both animal and pellet were weighed before and after assay initiation. Sessions were EthoVision-tracked and recorded via side-webcam. All food assay experiments were done in the afternoon under dim lighting conditions (40 lux).

**11. Optogenetic stimulation**

Mice were stimulated with bursting 473 nm light delivered in pulses of 100Hz in 5Hz intervals using a DPSS laser. Intensity was set to 10-11 mW at the end of each 200 nm patch cord (Thorlabs). For all experiments involving stimulation, all animals were tethered during training or habituation as well as testing.

**12. Histology**

After experiments, mice were anaesthetized deeply with sodium pentobarbital (200 mg/kg; intraperitoneal injection) and transcardially perfused with 10 mL of Ringer’s solution followed by 10 mL of cold 4% PFA in 1xPBS. Mice were decapitated and brains were extracted, fixed in 4% PFA for ≥24-hr at 4°C, then transferred to 30% sucrose in 1xPBS until they sank to the bottom of the solution. Coronal sections were then cut at 50 um and stored in 1xPBS at 4°C until processing. Sections were added to 25mL of 1xPBS and 2uL of DAPI and placed on a rocker at room temperature for 10-min. Sections were then mounted on glass microscope slides, cover-slipped with PVA-DABCO, and stored at room temperature.

**13. Ephys data analysis**

**Neural trajectories**

Principal component analysis (PCA) was conducted to evaluate the population-level firing rate dynamics. PCA is a commonly used dimensionality reduction tool that maximizes the variance in the data6. A single global PCA was done on a matrix containing mean firing rate per cell for each task-relevant events (win trials, lose trials, self entry tone, other entry tone, self entry ITI, other entry ITI) for all animals such that we could compare neural trajectories across groups7. This matrix had neurons in rows and columns where the mean firing rates during -5 to 5 seconds post task-relevant event using 100 ms bins. The neural trajectories for each task-relevant event were created per group by multiplying the coefficients obtained in the PCA multiplied by the mean firing rates per event. For each trajectory, the length was calculated as the sum of Euclidean distances between adjacent 100 ms bins. Distance between trajectories was calculated as the Euclidean distance between the two trajectories bin-by-bin. To allow for statistical comparisons the neural trajectory metrics were calculated using the leave one out (LOO) method, leaving out all the neurons from a single animal in every iteration. Importantly, in every iteration the same PCA coefficients per cell were used for the neural trajectory, since the PCA was done once prior to this step, but the neurons included varied. For visualization purposes we plotted the first 2 or 3 PC subspaces, but for quantification of trajectory lengths and distance between trajectories the first 148 PCs were used to capture 90% of the variance. To look at the neural trajectory alignment of the win and lose subspaces for dominant and subordinate animals, we orthogonalized the first PCs obtained from separately performing PCA on *win trials* or *lose trials* separately, and we quantified the alignment of the neural trajectories following the quantification process used by Miri and colleagues8.

**SVM classifier**

To test if rank or competitive success could be decoded from single trial mPFC population activity, we used a support vector machine (SVM) with a Gaussian kernel. To obtain single trial mPFC population activity we used the coefficients obtained for each neuron in the global PCA and created a single trial neural trajectory using the firing rate for that trial. We trained the SVM using the first 8 PCs per trial as features and either rank or the competitive outcome of the trial as the label. We did a 10-fold validation, briefly, the data was split into 10 subsets and in each iteration the training consisted of a different 90% subset of the data and the testing was done with the remaining 10% of the data. We reported the decoding performance via area under the curve (AUC) of the corresponding receiver operating characteristic curve (ROC). We chose this metric over classification accuracy since it is independent of the probability threshold defined for classification and incorporates both the true positive and false positive rates for predictions, and thus this a metric is more robust to non-uniform datasets. For the data in Figure 3 the SVM classifier was trained with all the data (1410 trials from dominant and subordinate mice pooled) and for the data in Supp Figure 8 b-c the classifier was trained with either dominant or subordinate data separated.

**Firing rate analysis and hierarchical clustering for neural activity**

To determine if a cell was significantly responding to an event we compared the firing rate in a baseline period vs the event onset (5 second window for baseline and event) using a Wilcoxon signed-rank test, and subsequently, excitation or inhibition was determined based on the average Z-score during the 5 second response window (if positive excited, if negative inhibited). Mean firing rate across events for the cue winning and losing trials, and port entries for self and other (tone and ITI) were concatenated per cell and arranged across animals in a matrix were column was time and row was neuron number. Using custom made MATLAB code, this matrix was clustered using agglomerative hierarchical clustering based on Euclidean distance and a threshold of 0.4 was used to determined functional clusters.

**14. AlphaTracker**

**Architecture of AlphaTracker**

First, a convolutional neural network is trained to predict the whole mouse location as a bounding box. For this, YOLOv39 was adapted to achieve high detection speed. Then the bounding box becomes the input of an additional convolutional neural network Squeeze-and-Excitation Networks (SENet)10 that tracks the body points of interest. Finally, to track animals across frames we use intersection overlap union (IOU). First, each animal’s position and body parts are represented using a set of hierarchical bounding boxes. Then for two adjacent frames, we calculate the similarity of all descriptor pairs between these two frames according to formula 1.


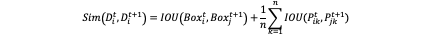


Formula 1

Where
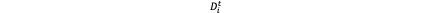
 is the descriptor of animal i at frame t,
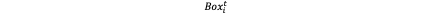
 is the bounding box of animal i at frame t predicted by the convolutional neural network.
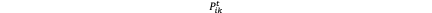
 is the box that wraps the kth body point of animal i at frame t. Intersection Overlap Union (IOU) (*,*) is defined as formula 2.


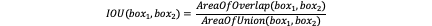


Formula 2

The descriptor similarities are then sorted in descending order. The animal in the current frame and the animal in the previous frame that has the highest similarity are first matched and assigned with the same tracking ID. Then, out of the pair of animals across frames that remain the ones with has the second highest similarity are matched and so on until all animals in the current frame are assigned with a tracking ID or until no animals are left unmatched in the previous frame. Finally, a Kalman filter11 is used to model the velocity and acceleration to predict the expected location of body points to try to overcome errors in cases with occlusion or tracking errors.

**Evaluation of AlphaTracker**

We randomly extract and labeled 800 frames from 4 different videos of two unmarked mice interacting in a clean cage, 200 of those frames were annotated by two people to determine human level accuracy. We split the data multiple times into non-overlapping sequences using different training-testing ratios (1:7, 1:3, 1:1 and 3:1) and trained 12 different networks with either 100,200, 400 or 600 frames (3 different splits for each ratio), and tested the tracking quality using the remaining frames. We quantified average precision12,13, the root mean square error (RSME) of the different networks, and how they compared to the precision and error across two humans.

**Training and data processing**

Reward competition videos were annotated using annotation tool Sloth. AlphaTracker was trained with at least 200 annotated images for a given camera angle and chamber. After training, AlphaTracker, tracked competition videos and generated x,y coordinates for both mice that were imported into MATLAB for further analysis. A human annotated the x,y location of the reward port for each video and that location was used to quantify distance to port and to normalize mouse locations for the 2D histogram of locations of the reward chamber.

**Unsupervised clustering for behavioral motifs**

AlphaTracker output was used to calculate features for agglomerative hierarchical clustering. First, the data was split into 500 ms clips. For each video clip, we extract the features of the individual mouse and for frames were mice were close to each other we also extract features of the interaction between mice from the pose estimation and tracking result as well as the original image. We used agglomerative hierarchical clustering. For each clip to normalize the data across videos we set the origin of coordinates of all the poses (left ear, right ear, nose and tailbase) to the nose position of the target mouse in the middle frame of the clip. In addition, the direction of x axis of coordinates of all the poses is set to be the orientation of the target mouse’s body vector in the middle frame of the clip. Fourier Transform was applied to the contour images of the mice. For the features shown in Supp Fig. 3 z-score normalization was applied. For each mouse the following features were used: length of head, length of body, angle between head and body, ear to nose length for each ear, ear-body angle for each ear, displacement of the mouse, angle of the body across frames, Fourier transform of the displacement and Fourier transform of the contour of the mouse. For social clustering, the following additional features were used: distance between noses, angles between mice, distance between tail of one mouse and nose of the other. All angles, distances and displacement are reported using polar coordinates.

**15. Ex vivo electrophysiological recordings and analysis:**

A separate cohort of mice (n= 6) was injected using the same viral strategy described above for unilateral ChrimsonR expression in mPFC-LH or mPFC-BLA neurons. Following 6 weeks of postoperative recovery (time-matched for behavioral recordings), mice were anesthetized with sodium pentobarbital (200 mg/kg-1; intraperitoneal injection), decapitated and brains were quickly extracted in oxygenated (95% O2 and 5% CO2) high sucrose cutting solution containing (in mM): 87 NaCl, 2.5 KCl, 1.3 NaH2PO4, 7 MgCl2, 25 NHCO3, 75 sucrose, 5 ascorbate, and 0.5 CaCl2 (~320-300 mOsm; pH = 7.3). Coronal sections (300 µm) containing the mPFC and LH or BLA were collected using a vibrating blade microtome (VT120; Leica, Buffalo Grove, IL). Slices were then incubated in oxygenated, modified artificial cerebrospinal fluid (ACSF) containing (in mM): 75 sucrose, 87 NaCL, 2.5 KCl, 1.3 NaH2PO4, 7 MgCl2, 0.5 CaCl2, 25 NaHCO3 and 5 ascorbic acid (~300 mOsm; pH =7.3) in a 31°C water bath for 1 hour before recordings were obtained.

Viral injections sites in the mPFC and LH or BLA for mPFC-LH and mPFC-BLA neurons, respectively, were confirmed. Whole-cell patch-clamp recordings were obtained from visually identified neurons expressing ChrimsonR (ChrimsonR+) and adjacent non-expressing neighboring neurons. Recordings of mPFC-LH and mPFC-BLA neurons were obtained using glass pipettes with a pipette resistance of 3-5 MΩ fabricated with a horizontal puller (P-1000, Sutter, CA) and filled with internal solution containing (in mM): 125 potassium gluconate, 20 HEPES, 10 NaCl, 3 MgATP, and 8 biocytin (~290mOsm; pH = 7.3). Recorded signals were acquired, amplified, and digitized at 10kHz using a Multiclamp 700B amplifier, Digidata144, and pClamp10 software (Molecular Devices, Sunnyvale, CA). Neurons were voltage-clamped at -70mV and given a 1 second constant red (589nm, 10mW light power at tip of fiber) light pulse to confirm ChrimsonR-mediated inward photocurrents. Neurons were then given a 1 Hz train of 5 ms red light pulses for 10 pulses in current-clamp under resting membrane conditions to assess photo-response latencies. Data were analyzed using Clampfit software (Molecular Devices, Sunnyvale, CA. The average photo-response latency of action potentials (APs) and excitatory postsynaptic potentials (EPSP) were measured as the time from light onset to the peak AP or EPSP for the 10 pulses for each cell.

**16. Decoding of behavioral states**

**Dataset**

The dataset used for modelling consisted of mPFC multiunit firing rate (X) and behavioral states (Y) determined from Alphatracker output along with annotation from trained experts. Data across X animals was pooled and arranged as:

X = #trials x #channels x #time_stamps x

Y = #trials x #time_stamps

The dataset consists of 965 trials, with ephys signals from 32 channels across 70 time stamps of 200 ms intervals. For each time stamp, we have assigned one of 9 behavior labels, which served as the ‘classes’ for the classification problem (see Fig 2a-b). The classification problem was to input the multi-unit activity sequence and obtain the corresponding behavior state sequence for the same trial.

Multiunit firing rate activity was determined by applying a common reference average and determining spikes using 4 standard deviations from the mean.

**Support Vector Machine (SVM)**

Because the SVM was successful in decoding rank type as well as trial outcome, our first strategy to attempt to decode behavior was to utilize an SVM with a Gaussian kernel. Since SVMs are traditionally binary classifiers, we utilized a one-vs-all strategy wherein for each of the 9 behavioral labels, we re-labeled the whole dataset (known as one-hot encoding of vectors) as zero (not-that-label) or one (that-label) and then ran the model on the dataset with 10-fold cross-validation. The model generated a likelihood for each of the potential behavior states to be observed for each time point. We subsequently constructed ROC curves in a similar one-vs-all fashion and computed the AUC scores. The AUC scores for the SVM model were close to chance and are reported in figure 2d.

**Hidden Markov Model – Generalized Linear Model**

The primary shortcoming of an SVM is two-fold. The first is the ‘static’ nature of the model and its inability to store information when making predictions, which is key to common inference problems involving time series. The second is the simplistic nature of the model —which does not resemble the neural computation of the PFC —and hence is unable to utilize the statistical power of the novel trial structure used in this study. Moreover, the 9-class problem is a far more complex problem than a 2-class problem (rank or win/lose) with a much noisier dataset. Interestingly, when we fit the data to a multinomial Generalized Linear Model (GLM) using the logit link function, we obtained significantly better AUC scores (Fig 2d). We hypothesized that this is due to the ability of the GLM to solve a multi-class problem, as well as its robustness to noise in the data, since a GLM looks at all the data points while an SVM focuses solely on the support vectors. This showed us that the GLM handles the classification much better than the SVM.

To incorporate temporal context into the model, we looked at the models proposed by Calhoun et al.14 as well as Escola et al.15. The latter first introduced the idea of using a Hidden Markov Model (HMM) for modeling the change in the internal state of the organism as transitions of ‘hidden states’ and the neural spikes as emissions obtained from the hidden states. Escola and colleagues used Poisson GLMs for computing probabilities of each transition between hidden states as well as for determining emissions of neural spikes. This approach provided a mechanism where both the state transition probabilities as well as neural spike emission probabilities varied with time. Calhoun et al proposed a modification of the HMM-GLM in which both the input and output were behavioral states, with a logit GLM instead of Poisson. While trying to decode the behavior of a male *Drosophila* during courtship rituals, they fed certain physical feedback cues that the male observed in the female into the GLM layers. In our study, we proposed yet another alteration, where the input to the GLM layers is the mPFC neural activity and the emissions are the behavioral states of the mice.

**Model Architecture & Assumptions**


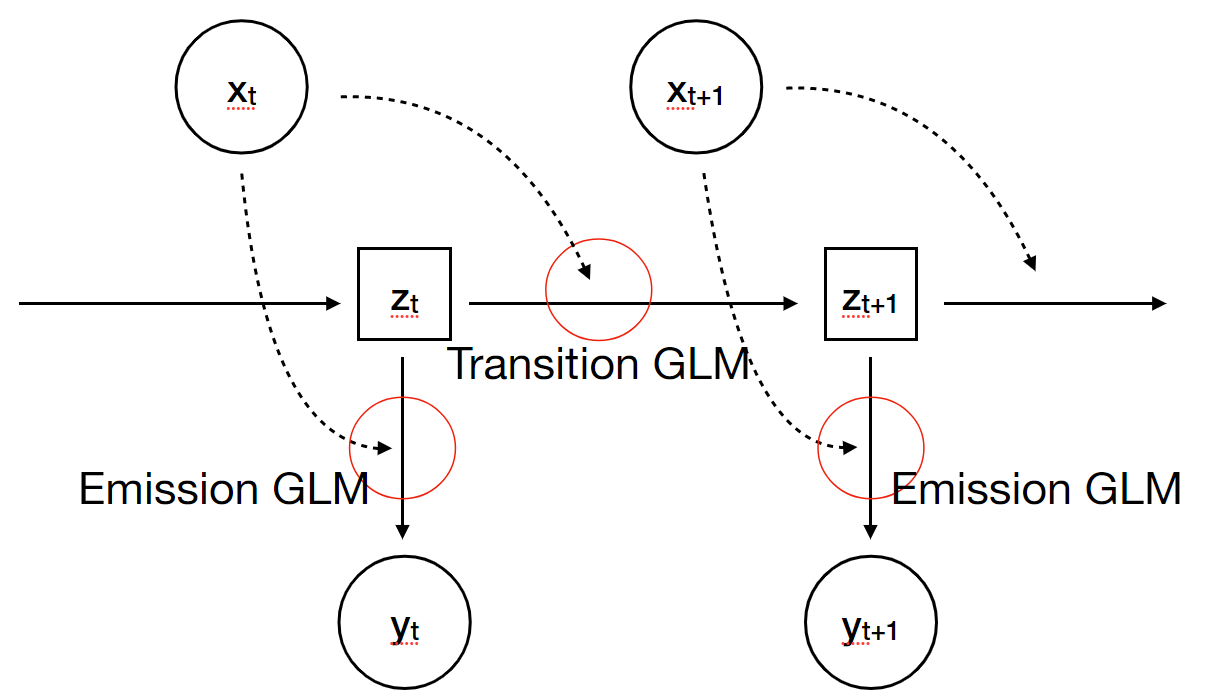


We propose that the mPFC activity is altered by internal states that cannot be measured directly. A stimulus (or a mixture of stimuli), along with the current internal state of an organism, produces behavior. In this study, we are using the mPFC neural response as the encoding of the stimulus in the brain region. In the HMM-GLM model the internal states as ‘hidden states’ in a Markov chain. The hidden states are represented by the variable zt (where ‘t’ is time) which can take any value between 1 and the total number of states. The hidden states are discretized and have unique integers assigned to them for simplicity. As time proceeds from ‘t’ to time ‘t+1’, there are ce16rtain probabilities of transitioning from the state zt to any of the other states (or staying the same). Furthermore, the HMMGLM models the behavioral states of the mice as the ‘emission outputs’, which are represented by the variable yt. The behavioral states are also discretized and can take values between 1 and 9 representing the 9 behavioral labels used. The HMM is modified such that there is a logistic regression layer between state transitions and output emissions. The input to the emission at a transition from time ‘t’ is the corresponding multi-unit firing rate, denoted by xt.

Both the state transitions and output emissions follow the one-step Markov assumption:

where,

,

,

,

,

and

(K = number of possible hidden states, J = number of behavioral states, T = number of time stamps in a trial and D = number of dimensions/channels of the input).

The first assumption states that given the current hidden state, the future state is independent of both the past states as well as behavior outputs. The second assumption states that given the current hidden state, the current emission is independent of both the past states as well as behavior outputs. Furthermore, the neural activity is treated as a deterministic variable since it is fixed for any given trial.

**Training**

Let the data pertaining to one trial be concatenated into large matrices as:

where each array is either a single dimensional or multidimensional discrete time series or sequence.

Now, let us look at the parametrization of the model:

1. For state initialization:

where: represents the set of prior probabilities for all possible hidden states for the first time point in a sequence.

1. For state transitions:

where: represents the array of filters (or weights) used for state transitions. For a transition from state m to state n, we use the weight vector . The data vector xt is augmented with a ‘1’ at the end to incorporate a bias.

1. For emissions:

where: represents the array of filters (or weights) used for output emissions. For an emission of output p from state q, we use the weight vector

Thus, is the set of all parameters such that total number of parameters scales linearly with the number of inputs and quadratically with the number of hidden states.

The introduction of the hidden states makes the estimation of the parameters an unsupervised learning process. We use an adapted version of the Baum-Welch implementation of the Expectation Maximization (E.M.) algorithm for this.

For one sample sequence, the complete data likelihood is described by:

While represents the “complete” likelihood, it is a misnomer since the hidden state sequence is not known. This then becomes the *marginal* likelihood instead. The E.M. algorithm helps us maximize the true likelihood, i.e., using the law of total probability, via iteratively maximizing the marginal likelihood in a roundabout manner. Here, is the set of all possible hidden state sequences.

**E-Step:**

Define: where is the likelihood function.

In order to compute the objective function , known as the Baum Auxiliary Function, we utilize a pair of algorithms called the forward and backward algorithms. Note that we are referring to as the ‘objective function’ since it will be optimized in the M-Step of the E.M. algorithm.

Forward Algorithm:

Define:

Thus:

And:

Backward Algorithm:

Define:

Thus:

, since it is deterministic

And:

Using these relationships, we can compute the single and consecutive pairwise marginal probabilities of the posterior distribution of the state sequence given the emission sequence as:

We can now describe the whole posterior, , using these new definitions.

Returning to the likelihood function :

Plugging all the expressions into the objective function :

Up until this point, only one sample trial sequence has been considered. Say we have M number of trials. Then, under the i.i.d. (independent & identically distributed) assumption, the overall objective function becomes:

**M-Step:**

This step involves the optimization of the objective function using an iterative scheme. While several methods can be used to achieve this, we resorted to gradient ascent. We initialize to chance and other elements of with a Gaussian distribution of zero mean and small standard deviation (), and then iteratively update as:

where is the learning rate.

In order to set a dynamic learning rate, we utilize a technique called Learning Rate Annealing, which is expressed as:

, where is the initial learning rate, is the number of epochs that have passed and is the annealing temperature. Thus, as more training epochs pass, the learning rate becomes smaller.

Before we can compute the gradients, we need to incorporate the Gaussian prior into our objective function. This would help regularize the expression for the assumption of the Gaussian distribution for our parameters.

Finally, let us look at the gradients:

, and

Where is the Kronecker delta.

Since a closed-form solution for these updates would be very complicated to obtain, we relied on numerical computing to optimize the objective function and train the model.

We followed the tips laid out by Rabiner to deal with problems of numerical overflow/underflow while computing the forward and backward steps of the training algorithm. We also binned all probability distributions to at least , to prevent numerical errors that MATLAB’s precision levels could not handle.

Cross-validation & Model Selection

Since we had to manually select the number of hidden states to be used, we resorted to a 10-fold cross validation mechanism to remove any biases in the process. In each fold, we trained the model on 9/10ths of the data, and then computed the likelihood on the 10th held-out part. We then plotted the log-likelihoods of the held-out data from all the folds as a function of number of hidden states with confidence intervals based on the standard error (Fig 2c). We also included the log likelihoods obtained from the GLM and SVM models via a similar 10-fold cross validation. We found that as you increase the number of hidden states, the log likelihood increases, reaching a plateau at the 6-state model.

Testing­

**Identifying the most probable hidden state sequence.**

Since , then for a given trial, is the most probable hidden state for time .

**Predicting the behavior of mice.**

We utilized the one-step-prediction method to decode the behavior of mice from neural activity. In short, the information from prior time point was used together with neural activity of the current time point to predict the behavioral label. For the time points of a given trial the most probable hidden state of the previous time point was stored. This helped compute the hidden state distribution for each time point.

For , there is no hidden state prior to this time. However, the distribution of hidden state is given by .

, say the most probable hidden state for the previous time point is given by . Now:

Since is the most probable value for , the probabilities while that for would be unity.

Thus:

This is how we generated the likelihoods for all the behavior labels for time . The behavior state with the highest likelihood was selected as the most probable behavior for time , i.e.,

.

Further we selected the state that leads to the highest likelihood for the correct behavior as compared with the ground truth as the most probable hidden state for time , i.e.,

In this way we obtain the likelihoods for the behavior states for all the time points of a trial in an inductive manner.

Lastly, we observed a time lag of one time bin (200 ms) in the model output predictions. Since this was present uniformly across the entire dataset, we simply shifted the model output backwards in time by one bin.

References:

1. Lindzey, G., Winston, H. & Manosevitz, M. Social Dominance in Inbred Mouse Strains. *Nature* **191**, 474 (1961).

2. Wang, F. *et al.* Bidirectional Control of Social Hierarchy by Synaptic Efficacy in Medial Prefrontal Cortex. *Science* **334**, 693–697 (2011).

3. Rossant, C. *et al.* Spike sorting for large, dense electrode arrays. *Nat. Neurosci.* **19**, 634–641 (2016).

4. Walton, M. E., Bannerman, D. M. & Rushworth, M. F. The role of rat medial frontal cortex in effort-based decision making. *J. Neurosci.* **22**, 10996–11003 (2002).

5. Moy, S. S. *et al.* Sociability and preference for social novelty in five inbred strains: an approach to assess autistic-like behavior in mice. *Genes Brain Behav.* **3**, 287–302 (2004).

6. Cunningham, J. P. & Yu, B. M. Dimensionality reduction for large-scale neural recordings. *Nat. Neurosci.* **17**, 1500–1509 (2014).

7. Linsenbardt, D. N., Timme, N. M. & Lapish, C. C. Encoding of the Intent to Drink Alcohol by the Prefrontal Cortex is blunted in Rats with a Family History of Excessive Drinking. *eNeuro* **6**, (2019).

8. Miri, A. *et al.* Behaviorally selective engagement of short-latency effector pathways by motor cortex. *Neuron* **95**, 683–696 (2017).

9. Redmon, J. & Farhadi, A. Yolov3: An incremental improvement. *ArXiv Prepr. ArXiv180402767* (2018).

10. Hu, J., Shen, L. & Sun, G. Squeeze-and-excitation networks. in *Proceedings of the IEEE conference on computer vision and pattern recognition* 7132–7141 (2018).

11. Kalman, R. E. A new approach to linear filtering and prediction problems. (1960).

12. Pishchulin, L. *et al.* DeepCut: Joint Subset Partition and Labeling for Multi Person Pose Estimation. *ArXiv151106645 Cs* (2016).

13. Andriluka, M. *et al.* PoseTrack: A Benchmark for Human Pose Estimation and Tracking. (2017).

14. Calhoun, A. J., Pillow, J. W. & Murthy, M. Unsupervised identification of the internal states that shape natural behavior. *Nat. Neurosci.* **22**, 2040–2049 (2019).

15. Escola, S., Fontanini, A., Katz, D. & Paninski, L. Hidden Markov models for the stimulus-response relationships of multistate neural systems. *Neural Comput.* **23**, 1071–1132 (2011).

16. Rabiner, L. R. A tutorial on hidden Markov models and selected applications in speech recognition. *Proc. IEEE* **77**, 257–286 (1989).
